# Supplementary material for: The Non-JAZ TIFY Protein TIFY8 from Arabidopsis thaliana Is a Transcriptional Repressor
Source: PubMed Central journal article supplement (PMC3885651; doi:10.1371/journal.pone.0084891), 2014-01-08
Supplement: pone.0084891.s003.pdf [file pone.0084891.s003.pdf]

Supplementary Table S1. MALDI-TOF/TOF-MS identification of TIFY8 interactors.

| Prey       |           |                              | PMF data         |                      |                       |                           |                                 | MSMS data          |                     |       |     |           |          |           |         |      |           |          |                        |               |
|------------|-----------|------------------------------|------------------|----------------------|-----------------------|---------------------------|---------------------------------|--------------------|---------------------|-------|-----|-----------|----------|-----------|---------|------|-----------|----------|------------------------|---------------|
| Prey Locus | Prey Name | Found/<br>2 exp <sup>1</sup> | Protein<br>Score | E-value <sup>2</sup> | RMS<br>error<br>(ppm) | Sequence<br>coverage<br>% | Unique<br>Peptides <sup>3</sup> | Total Ion<br>Score | Number <sup>4</sup> | Start | End | Observed  | Mr(Exp)  | Mr(Calc)  | Delta   | Miss | Ion Score | Expect   | Peptide                | Modification  |
| AT4G14720  | PPD2      | 2                            | 217              | 7,10E-18             | 8                     | 31                        | 9                               | 162                | 1                   | 76    | 86  | 1217,6917 | 1216,684 | 1216,6928 | -0,0084 | 0    | 25        | 5,90E-02 | ILVSQPPNPPR            |               |
|            |           |                              |                  |                      |                       |                           |                                 |                    | 2                   | 18    | 29  | 1417,7452 | 1416,738 | 1416,746  | -0,0081 | 0    | 61        | 2,40E-05 | LLTEEDISQLTR           |               |
|            |           |                              |                  |                      |                       |                           |                                 |                    | 3                   | 60    | 74  | 1533,7501 | 1532,743 | 1532,7471 | -0,0042 | 0    | 48        | 3,80E-04 | ALYEPGDDSGAGILR        |               |
|            |           |                              |                  |                      |                       |                           |                                 |                    | 4                   | 179   | 200 | 2403,1855 | 2402,178 | 2402,1689 | 0,0094  | 0    | 28        | 3,00E-02 | SIMHFAANPIDLPENGIFASSR | Oxidation (M) |
| AT4G28910  | NINJA     | 2                            | 73               | 1,70E-03             | 4                     | 13                        | 3                               | 60                 | 1                   | 276   | 292 | 1618,8217 | 1617,814 | 1617,8111 | 0,0033  | 0    | 60        | 2,20E-05 | DGSGGIVALSQSPFAGR      |               |
| AT4G32295  | unknown   | 2                            |                  |                      |                       |                           |                                 | 36                 | 1                   | 26    | 34  | 1088,6483 | 1087,641 | 1087,639  | 0,0021  | 0    | 36        | 2,40E-03 | GLLIQEIFR              |               |

<sup>1</sup>Number of times that a prey was found in 2 independent TAP experiments with the respective bait

<sup>2</sup>The E-value in Mascot corresponds to the number of times one would expect this score by chance alone

<sup>3</sup>Unique peptides found per identification. Peptides are not present in control TAP experiments with eg. GFP or GUS

<sup>4</sup>Number of peptides from which a sequence was obtained
