# Supplementary material for: The Non-JAZ TIFY Protein TIFY8 from Arabidopsis thaliana Is a Transcriptional Repressor
Source: PubMed Central journal article supplement (PMC3885651; doi:10.1371/journal.pone.0084891), 2014-01-08
Supplement: pone.0084891.s004.pdf [file pone.0084891.s004.pdf]

**Supplementary Table S2.** Primers used in this study

| ID         |    | Sequence                                                        | Use         |
|------------|----|-----------------------------------------------------------------|-------------|
| TIFY8-N    | Fw | GGGGACAAGTTTGTACAAAAAAGCAGGCTTA <b>AT</b> GATGGTGAACCACAAC      | Figure 2B-C |
| TIFY8-N    | Rv | GGGGACCACTTTGTACAAGAAAGCTGGGTAT <b>CA</b> CCGATTTCCGGTATTGAAGGG | Figure 2B-C |
| TIFY8-C    | Fw | GGGGACAAGTTTGTACAAAAAAGCAGGCTTA <b>ATG</b> AAAGACTTGGCGTCG      | Figure 2B-C |
| TIFY8-C    | Rv | GGGGACCACTTTGTACAAGAAAGCTGGGTAT <b>CA</b> TGTGGCTTCTTTTC        | Figure 2B-C |
| TPL-N      | Fw | GGGGACAAGTTTGTACAAAAAAGCAGGCTCC <b>ATG</b> TCTTCTCTTAGTAGAGAG   | Figure 3D   |
| TPL-N      | Rv | GGGGACCACTTTGTACAAGAAAGCTGGGTCT <b>CM</b> ATTTTTTACAAGCTGGTGTTG | Figure 3D   |
| JAZ10      | Fw | ACGCTCCTAAGCCTAAGTTCC                                           | Figure 4A   |
| JAZ10      | Rv | TCGAAATCGCACCTGAATA                                             | Figure 4A   |
| UBC        | Fw | CTGCGACTCAGGGAATCTTCTAA                                         | Figure 4+6  |
| UBC        | Rv | TTGTGCCATTGAATTGAACCC                                           | Figure 4+6  |
| TIFY8 prom | Fw | GGGGACAAGTTTGTATAGAAAAGTTGTCCTGAAGAGCCTCGATTTT                  | Figure 5    |
| TIFY8 prom | Rv | GGGGACTGCTTTTTTGTACAAACTTGAAAACCAAGTGTGTCAGTGTGG                | Figure 5    |
| TIFY8-1    | Fw | CCGACAGACAGAACAAGATAAGC                                         | Figure 6E   |
| TIFY8-1    | Rv | AAGCAGAAGCCGTGGAAGG                                             | Figure 6E   |
| TIFY8-2    | Fw | GGGAATCATCTTGATGGGATAC                                          | Figure 6E   |
| TIFY8-2    | Rv | CCTGAAAACCGATTGCTCAT                                            | Figure 6E   |
| TIFY8-3    | Fw | CCATCAGTTATTGCTCAGACAG                                          | Figure 6E   |
| TIFY8-3    | Rv | GCTTGAGTTTGGCATTGTAAG                                           | Figure 6E   |
| TIFY8-4    | Fw | AGGCGGATGTGATAATGG                                              | Figure 6E   |
| TIFY8-4    | Rv | CTGGAGGTAGTTGATGAC                                              | Figure 6E   |

TCM: reverse primers were ambiguity coded to obtain both clones with stop codon (TGA) and without (GGA).
